# Supplementary material for: Surface reaction kinetics of the methanol synthesis and the water gas shift reaction on Cu/ZnO/Al2O3
Source: Royal Society of Chemistry journal article supplement (doi:10.1039/d1re00040c), 2021-01-01
Supplement: d1re00040c1.pdf [file d1re00040c1.pdf]

## Surface reaction kinetics of the methanol synthesis and the water-gas shift reaction on Cu/ZnO/Al<sub>2</sub>O<sub>3</sub>

Bruno Lacerda de Oliveira Campos<sup>1</sup>, Karla Herrera Delgado<sup>1</sup>, Stefan Wild<sup>1</sup>, Felix Studt<sup>1,2</sup>,  
Stephan Pitter<sup>1</sup>, Jörg Sauer<sup>1</sup>

<sup>1</sup>Institute for Catalysis Research and Technology (IKFT), Karlsruhe Institute of Technologie (KIT), Hermann-von-Helmholtz-Platz 1, 76344 Eggenstein-Leopoldshafen, Germany. E-mail: karla.herrera@kit.edu; Tel: +49 721 608 28631

<sup>2</sup>Institute for Chemical Technology and Polymer Chemistry (ITCP), Karlsruhe Institute of Technologie (KIT), Engesserstr. 18-20, 76131 Karlsruhe, Germany

### Supplementary Material

#### 1. Thermodynamic Consistency – Solving the minimization problem

The constrained minimization problem of the thermodynamic consistency can be solved with the method of the Lagrangean multipliers. The Lagrangean function is:

$$\begin{aligned} L(E_{A,k}^{+,TC}, E_{A,k}^{-,TC}, \Delta S^{\neq,+}, \Delta S^{\neq,-}, \beta_k^+, \beta_k^-, \lambda_{1-3m}) = & \int_{T_1}^{T_2} \left\{ \sum_{k=1}^{Nr} w_k \cdot \{ [E_{A,f} \right. \\ & - T \cdot (\Delta S^{\neq,+} + \ln(T) \cdot \beta_k^+) - (E_{A,k}^{+,Orig.} - T \cdot \Delta S^{\neq,+})^2 + [E_{A,rk}^{TC} \\ & - T \cdot (\Delta S^{\neq,-} + \ln(T) \cdot \beta_k^-) - (E_{A,k}^{-,Orig.} - T \cdot \Delta S^{\neq,-})^2 \} dT \} \\ & + \sum_{m=1}^{Nm} (\lambda_{1m} \cdot q_{1m} + \lambda_{2m} \cdot q_{2m} + \lambda_{3m} \cdot q_{3m}) \end{aligned} \quad (S1)$$

Where  $\lambda_{1-3,m}$  are the Lagrangean multipliers. The solution of this problem (minimum) lies when all partial derivatives of the Lagrangean function are zero.

$$\frac{\partial L}{\partial E_{A,k}^{+,TC}} = \frac{\partial L}{\partial E_{A,k}^{-,TC}} = \frac{\partial L}{\partial \Delta S^{\neq,+}} = \frac{\partial L}{\partial \Delta S^{\neq,-}} = \frac{\partial L}{\partial \beta_k^+} = \frac{\partial L}{\partial \beta_k^-} = \frac{\partial L}{\partial \lambda_{1-3m}} = 0 \quad (S2)$$

The calculation of the partial derivatives leads to a linear system, whose solution gives the corrected values of  $E_A$ ,  $\Delta S^{\neq}$ , and  $\beta$ .

#### 2. Reactor simulation – Solving the differential equations of the Plug Flow Reactor (PFR)

The steady-state solution of the surface intermediate coverages (Eq. (45) in the article) can be found either by integrating the equations in time or by setting all time derivatives to zero and solving the non-linear algebraic system. The latter has a much lower computational time, but it requires a significantly close initial guess to converge to the correct answer.

Therefore, in this work, a database of initial guesses was built for different temperatures, pressures and gas phase concentrations, both by integrating the equations in time, and by solving the non-linear algebraic system of equations with initial guesses chosen by trial and error. With this database, an initial guess method was created (Fig. S3), which gives sufficiently good initial guesses for the studied region of operating conditions. This algebraic system has to be solved for each axial position in the reactor, as the coverage of the species vary along the reactor length. A scheme of the procedure used to solve the PFR model is described in Fig. S4. The numerical simulations were performed using the commercial software Matlab 2018. By informing the analytical Jacobian matrix of the algebraic system (Eq. (45) in the article) to the mathematical solver, the computational time dropped significantly.

### **3. Reactor simulation – Solving the differential equations of the Continuous Stirred Tank Reactor (CSTR)**

The ordinary set of differential equations of the CSTR requires a certain strategy to be solved. On one hand, the steady-state achievement by integrating the gas phase equations in time (Eq. (48) in the article) usually requires an integration period around 1 to  $10^3$  s (depending on the GHSV), while the steady-state achievement by integrating the surface coverages equations (Eq. (49) in the article) usually requires an integration period around  $10^{-5}$  to  $10^{-3}$  s. This large difference between integration periods creates numerical instability if attempting to integrate all equations together, unless a tiny time step is used, e.g.  $10^{-7}$  s, which would require a longish computational time.

On the other hand, setting all the time derivatives to zero (steady-state definition) and solving the non-linear system of equations is also challenging, as it would only converge to the correct answer if a sufficiently good initial guess for all  $y_j$  and  $\theta_i$  is given. The strategy chosen was somewhat similar to the approach of the PFR: the gas phase equations (Eq. (48) in the article) were integrated in time until steady-state was achieved. For each time step, the time derivatives of the surface species equations (Eq. (49) in the article) were set to zero and the non-linear algebraic system was solved. A schematic description of the procedure used to solve the CSTR model is described in Fig. S5.

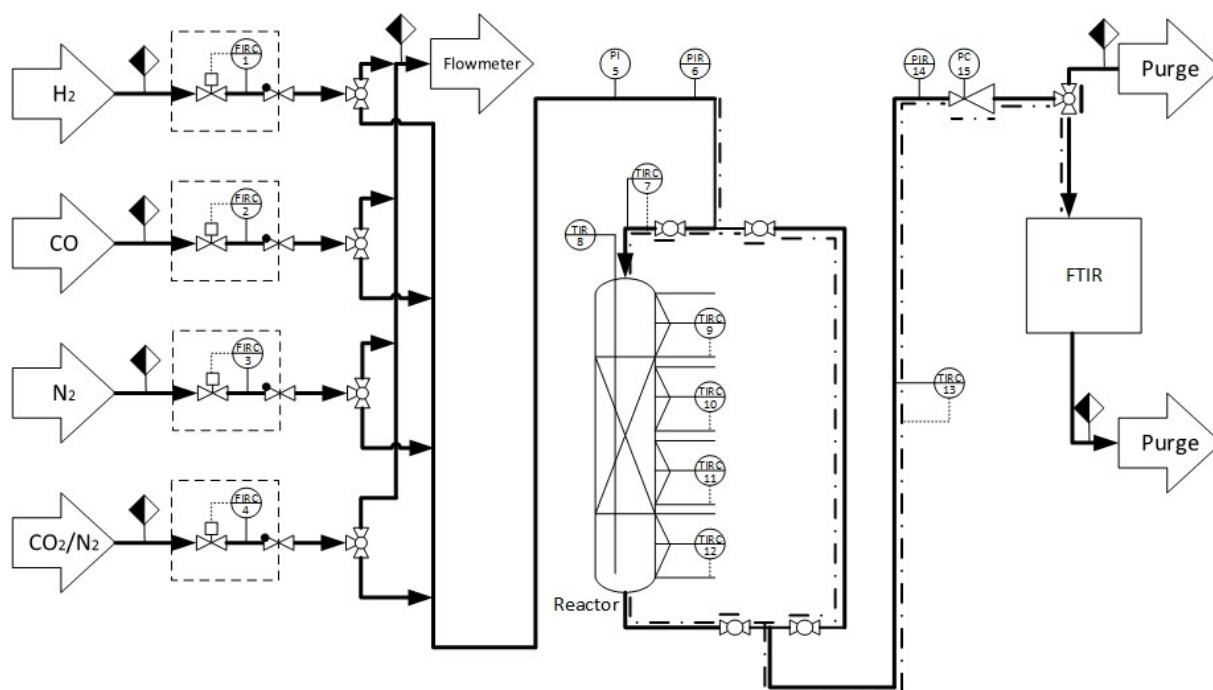

**Fig. S1.** Flow diagram of the experimental setup of the fixed-bed plug flow reactor.

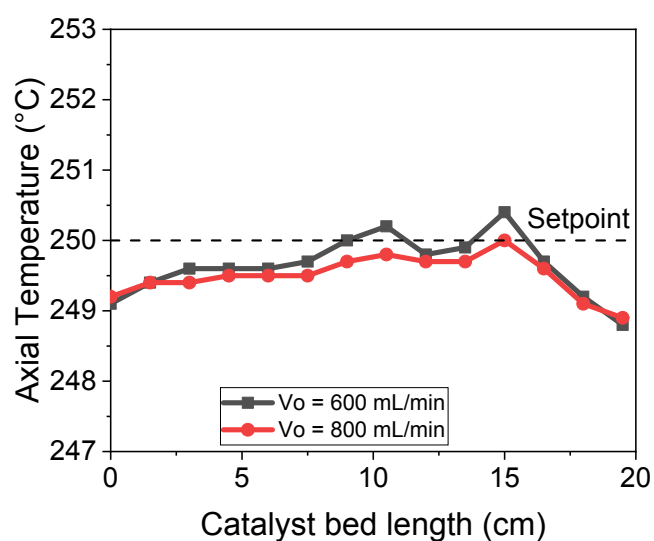

**Fig. S2.** Temperature axial profile of the reactor at 61 bar (abs.), 250 °C,  $H_2/CO/CO_2/N_2 = 55/12/3/30\%$  v/v.

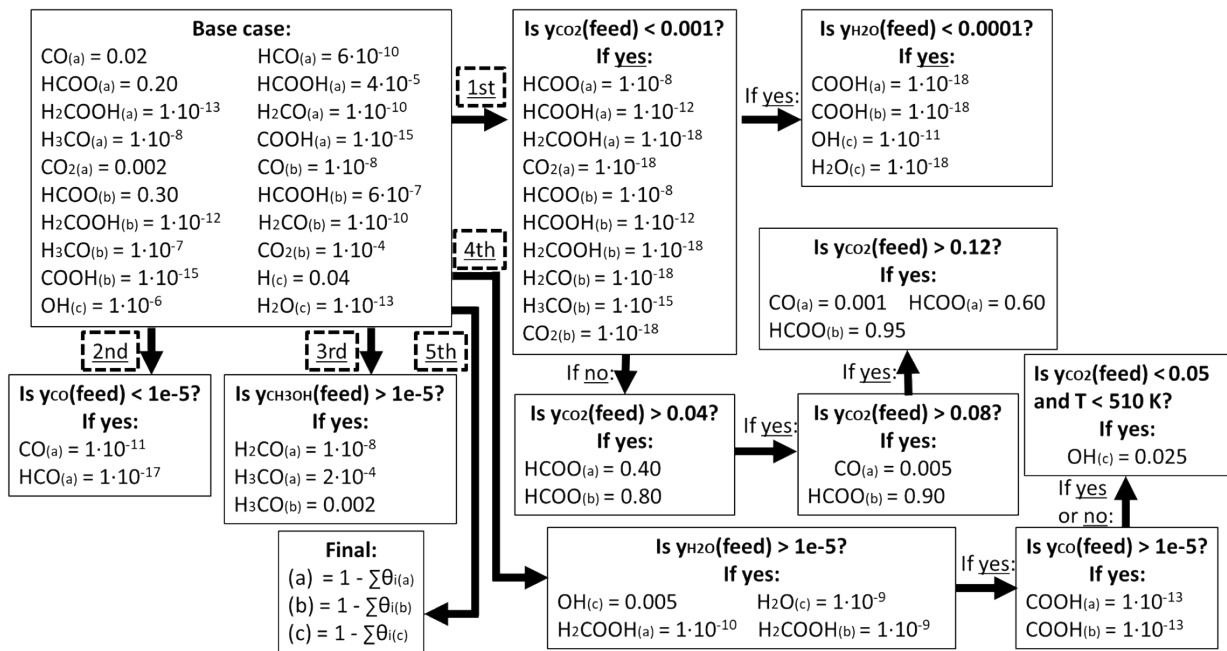

**Fig. S3.** Initial guess method: finding a proper initial guess to calculate the coverages with the Newton-Raphson method instead of integrating the differential equations in time.

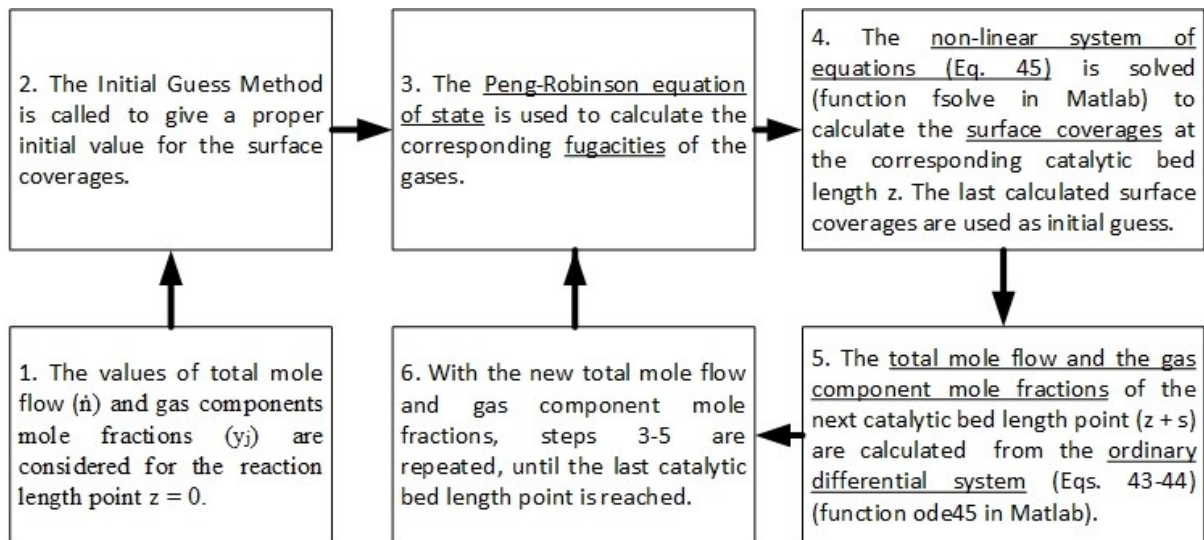

**Fig. S4.** Step-by-step method to solve the kinetic model of the PFR.

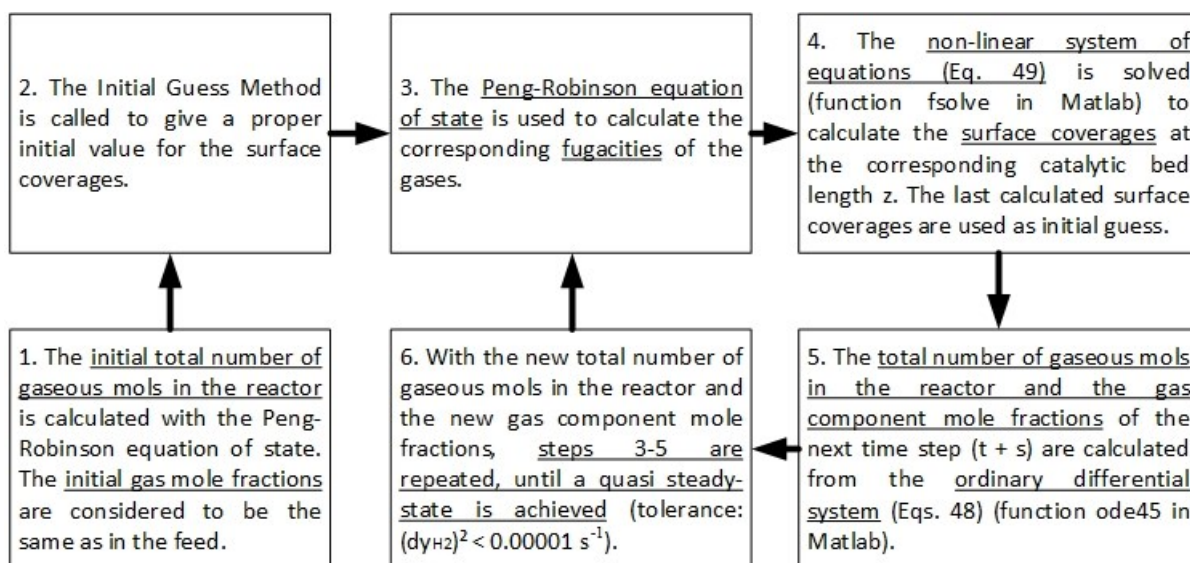

**Fig. S5.** Step-by-step method to solve the kinetic model of the CSTR.

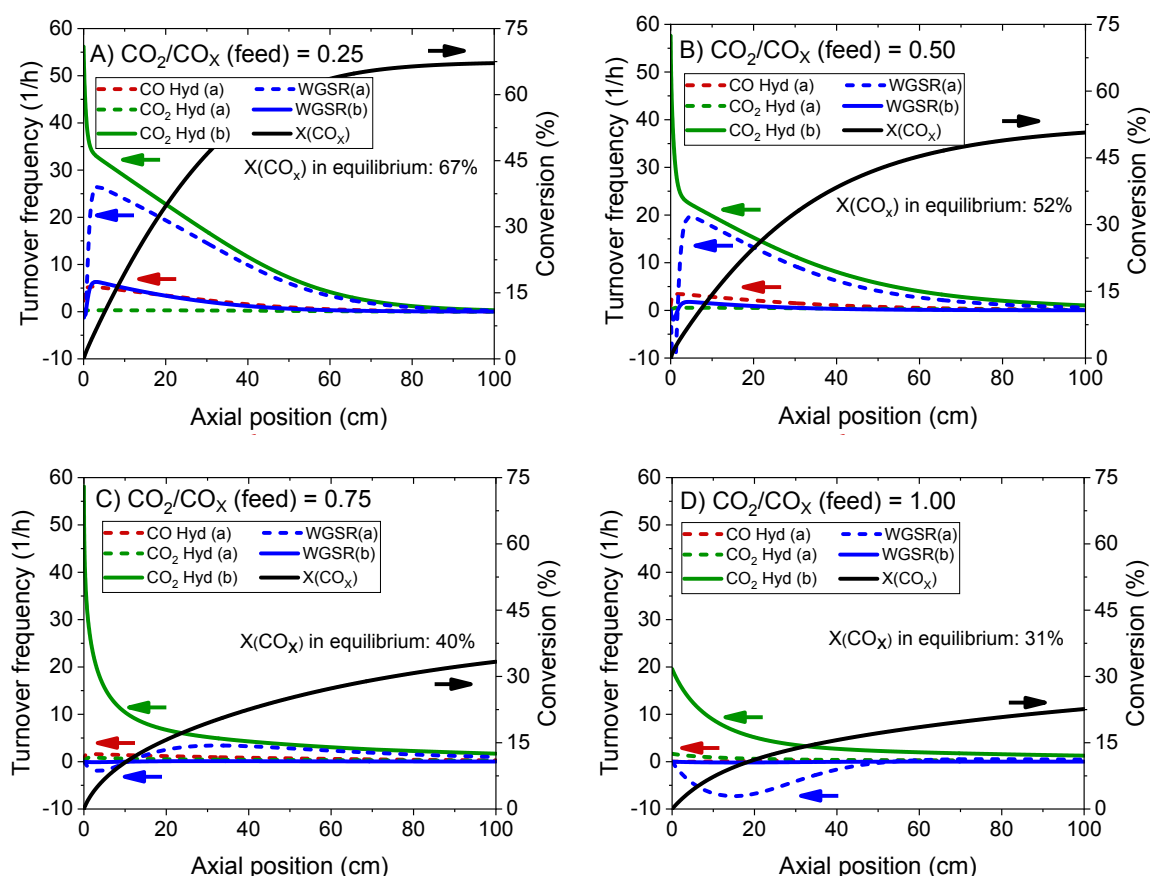

**Fig. S6.** Turnover frequency and conversion along a methanol synthesis reactor with a length of 100 cm. Operating conditions: 250 °C, 60 bar, GHSV =  $4.8 \text{ L}_s \cdot \text{h}^{-1} \cdot (\text{g}_{\text{cat}})^{-1}$ , feed concentration:  $\text{H}_2/\text{CO}_x = 80/20\% \text{ v/v}$ . A)  $\text{CO}_2/\text{CO}_x = 0.25$ . B)  $\text{CO}_2/\text{CO}_x = 0.50$ . C)  $\text{CO}_2/\text{CO}_x = 0.75$ . D)  $\text{CO}_2/\text{CO}_x = 1.00$ .

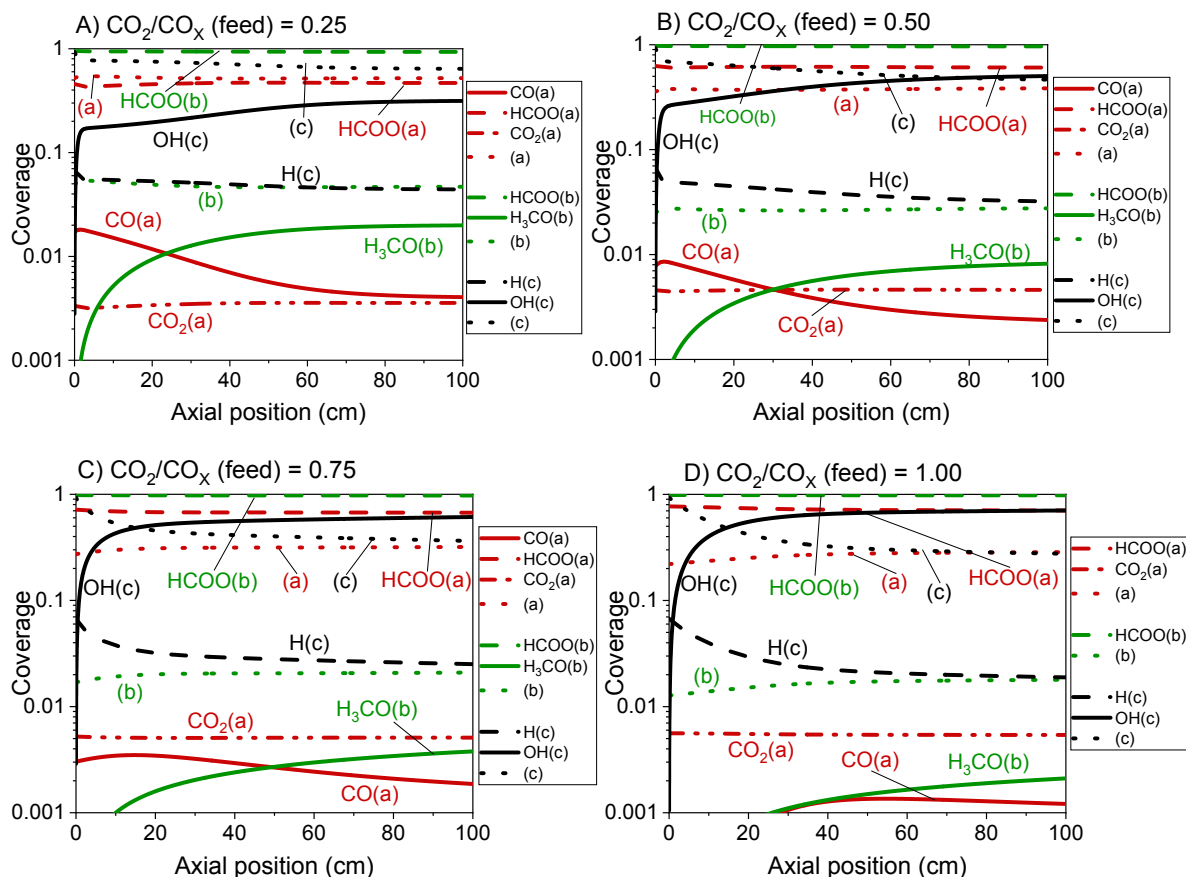

**Fig. S7.** Coverage of the surface species along the methanol synthesis reactor with a length of 100 cm. Operating conditions: 250 °C, 60 bar, GHSV = 4.8 L<sub>S</sub>·h<sup>-1</sup>·(g<sub>cat</sub>)<sup>-1</sup>, feed concentration: H<sub>2</sub>/CO<sub>x</sub> = 80/20% v/v. A) CO<sub>2</sub>/CO<sub>x</sub> = 0.25. B) CO<sub>2</sub>/CO<sub>x</sub> = 0.50. C) CO<sub>2</sub>/CO<sub>x</sub> = 0.75. D) CO<sub>2</sub>/CO<sub>x</sub> = 1.00.

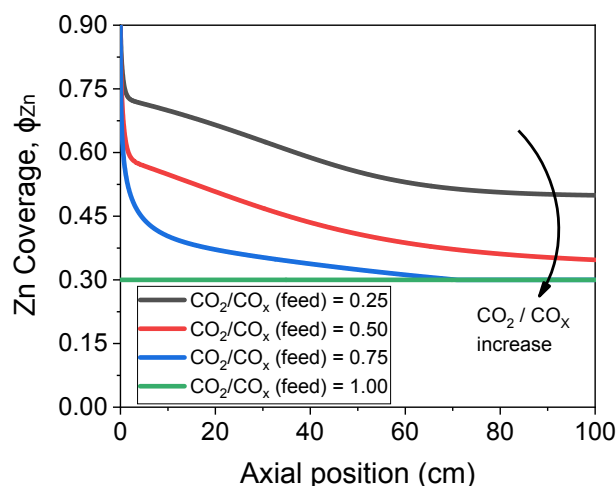

**Fig. S8.** Zinc coverage along the methanol synthesis reactor with a length of 100 cm. Operating conditions: 250 °C, 60 bar, GHSV = 4.8 L<sub>S</sub>·h<sup>-1</sup>·(g<sub>cat</sub>)<sup>-1</sup>, feed concentration: H<sub>2</sub>/CO<sub>x</sub> = 80/20% v/v. A) CO<sub>2</sub>/CO<sub>x</sub> = 0.25. B) CO<sub>2</sub>/CO<sub>x</sub> = 0.50. C) CO<sub>2</sub>/CO<sub>x</sub> = 0.75. D) CO<sub>2</sub>/CO<sub>x</sub> = 1.00.

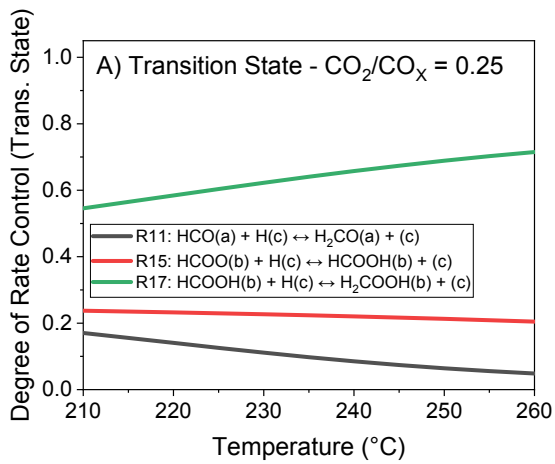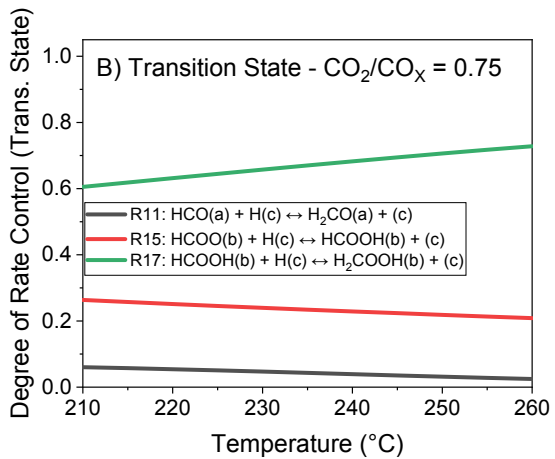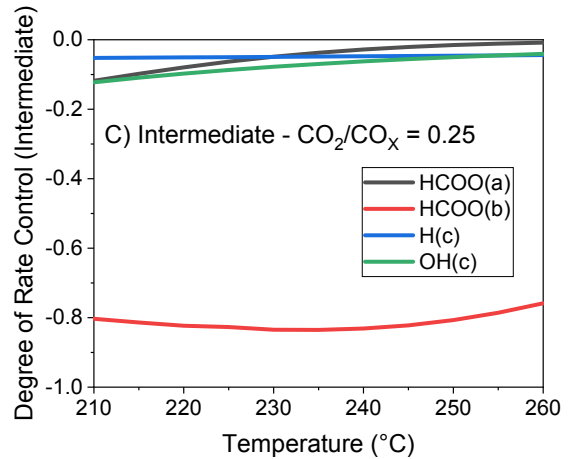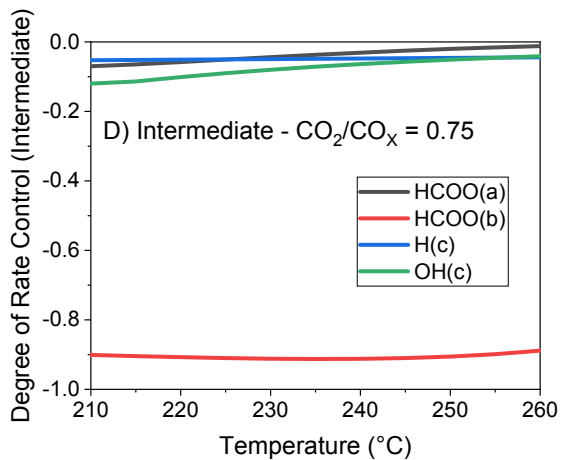

**Fig. S9.** Degree of Rate Control (DRC) analysis of the methanol production at 30 bar and 210-260  $^{\circ}\text{C}$ . Gas concentration:  $\text{H}_2/\text{CO}_x/\text{CH}_3\text{OH}/\text{H}_2\text{O} = 79.8/19.8/0.2/0.2\%$  v/v. A) Trans. State -  $\text{CO}_2/\text{CO}_x = 0.25$ . B) Trans. State -  $\text{CO}_2/\text{CO}_x = 0.75$ . C) Intermediate -  $\text{CO}_2/\text{CO}_x = 0.25$ . D) Intermediate -  $\text{CO}_2/\text{CO}_x = 0.75$ .

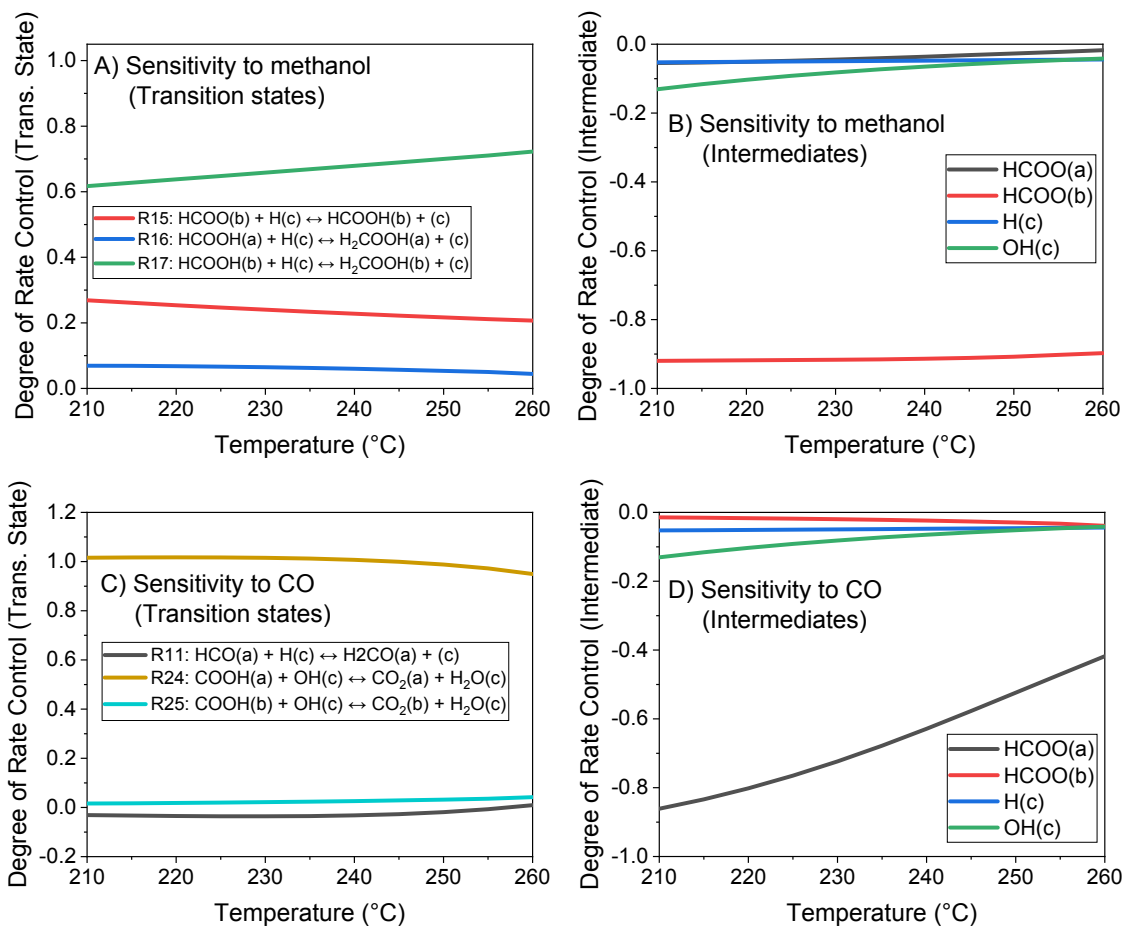

**Fig. S10** Degree of Rate Control (DRC) analysis at 210-260 °C, 30 bar, and a gas concentration of  $\text{H}_2/\text{CO}/\text{CO}_2/\text{CH}_3\text{OH}/\text{H}_2\text{O} = 79.8/0.2/19.6/0.2/0.2\%$  v/v. A) Sensitivity to methanol, transition states. B) Sensitivity to methanol, intermediates. C) Sensitivity to CO, transition states. D) Sensitivity to CO, intermediates.



**Table S1.** Experimental data performed in the PFR. \*The volume flow description considers the standard temperature of 298.15 K and the pressure of 1 bar.

| N° | Abs. Pres. (bar) | Vol. Flow*                    | Temp. (°C) | Inlet Flow (% v/v) |       |                 |                | Outlet Flow (% v/v) |                 |                    |
|----|------------------|-------------------------------|------------|--------------------|-------|-----------------|----------------|---------------------|-----------------|--------------------|
|    |                  | $\left(\frac{Ls}{min}\right)$ |            | H <sub>2</sub>     | CO    | CO <sub>2</sub> | N <sub>2</sub> | CO                  | CO <sub>2</sub> | CH <sub>3</sub> OH |
| 1  | 41               | 600                           | 220        | 35.33              | 11.51 | 2.68            | 0.00           | 10.9                | 2.58            | 0.77               |
| 2  | 41               | 600                           | 235        | 35.33              | 11.51 | 2.68            | 0.00           | 10.82               | 2.61            | 1.13               |
| 3  | 41               | 600                           | 250        | 35.33              | 11.51 | 2.68            | 0.00           | 10.47               | 2.66            | 1.65               |
| 4  | 41               | 800                           | 220        | 35.32              | 11.55 | 2.68            | 0.00           | 11.11               | 2.58            | 0.58               |
| 5  | 41               | 800                           | 235        | 35.32              | 11.55 | 2.68            | 0.00           | 11.02               | 2.60            | 0.87               |
| 6  | 41               | 800                           | 250        | 35.32              | 11.55 | 2.68            | 0.00           | 10.69               | 2.64            | 1.34               |
| 7  | 41               | 600                           | 220        | 35.37              | 8.61  | 5.50            | 0.00           | 8.23                | 5.28            | 0.80               |
| 8  | 41               | 600                           | 235        | 35.37              | 8.61  | 5.50            | 0.00           | 8.11                | 5.32            | 1.11               |
| 9  | 41               | 600                           | 250        | 35.37              | 8.61  | 5.50            | 0.00           | 7.83                | 5.41            | 1.52               |
| 10 | 41               | 800                           | 220        | 35.36              | 8.63  | 5.50            | 0.00           | 8.43                | 5.26            | 0.62               |
| 11 | 41               | 800                           | 235        | 35.36              | 8.63  | 5.50            | 0.00           | 8.31                | 5.29            | 0.86               |
| 12 | 41               | 800                           | 250        | 35.36              | 8.63  | 5.50            | 0.00           | 8.12                | 5.37            | 1.24               |
| 13 | 41               | 600                           | 220        | 35.34              | 5.80  | 8.37            | 0.00           | 5.55                | 7.98            | 0.78               |
| 14 | 41               | 600                           | 235        | 35.34              | 5.80  | 8.37            | 0.00           | 5.49                | 7.98            | 1.02               |
| 15 | 41               | 600                           | 250        | 35.34              | 5.80  | 8.37            | 0.00           | 5.34                | 7.99            | 1.23               |
| 16 | 41               | 800                           | 220        | 35.36              | 5.75  | 8.37            | 0.00           | 5.65                | 7.97            | 0.63               |
| 17 | 41               | 800                           | 235        | 35.36              | 5.75  | 8.37            | 0.00           | 5.68                | 7.94            | 0.83               |
| 18 | 41               | 800                           | 250        | 35.36              | 5.75  | 8.37            | 0.00           | 5.55                | 7.98            | 1.03               |
| 19 | 41               | 600                           | 210        | 45.38              | 12.94 | 1.34            | 0.00           | 12.71               | 1.25            | 0.54               |
| 20 | 41               | 600                           | 220        | 45.38              | 12.94 | 1.34            | 0.00           | 12.65               | 1.28            | 0.74               |
| 21 | 41               | 600                           | 230        | 45.38              | 12.94 | 1.34            | 0.00           | 12.45               | 1.30            | 1.12               |
| 22 | 41               | 600                           | 240        | 45.38              | 12.94 | 1.34            | 0.00           | 12.13               | 1.32            | 1.59               |
| 23 | 41               | 600                           | 250        | 45.38              | 12.94 | 1.34            | 0.00           | 11.78               | 1.34            | 2.02               |
| 24 | 41               | 600                           | 260        | 45.38              | 12.94 | 1.34            | 0.00           | 11.59               | 1.36            | 2.27               |
| 25 | 41               | 800                           | 210        | 45.34              | 13.01 | 1.35            | 0.00           | 12.83               | 1.26            | 0.39               |
| 26 | 41               | 800                           | 220        | 45.34              | 13.01 | 1.35            | 0.00           | 12.73               | 1.28            | 0.54               |
| 27 | 41               | 800                           | 230        | 45.34              | 13.01 | 1.35            | 0.00           | 12.64               | 1.29            | 0.83               |
| 28 | 41               | 800                           | 240        | 45.34              | 13.01 | 1.35            | 0.00           | 12.36               | 1.31            | 1.19               |
| 29 | 41               | 800                           | 250        | 45.34              | 13.01 | 1.35            | 0.00           | 12.09               | 1.33            | 1.61               |
| 30 | 41               | 800                           | 260        | 45.34              | 13.01 | 1.35            | 0.00           | 11.87               | 1.35            | 1.89               |
| 31 | 41               | 600                           | 210        | 45.32              | 11.71 | 2.69            | 0.00           | 11.48               | 2.59            | 0.51               |
| 32 | 41               | 600                           | 220        | 45.32              | 11.71 | 2.69            | 0.00           | 11.35               | 2.56            | 0.79               |
| 33 | 41               | 600                           | 230        | 45.32              | 11.71 | 2.69            | 0.00           | 11.03               | 2.59            | 1.16               |
| 34 | 41               | 600                           | 240        | 45.32              | 11.71 | 2.69            | 0.00           | 10.68               | 2.62            | 1.70               |
| 35 | 41               | 600                           | 250        | 45.32              | 11.71 | 2.69            | 0.00           | 10.26               | 2.65            | 2.21               |
| 36 | 41               | 600                           | 260        | 45.32              | 11.71 | 2.69            | 0.00           | 10.05               | 2.68            | 2.51               |
| 37 | 41               | 800                           | 210        | 45.29              | 11.76 | 2.70            | 0.00           | 11.62               | 2.56            | 0.39               |
| 38 | 41               | 800                           | 220        | 45.29              | 11.76 | 2.70            | 0.00           | 11.49               | 2.55            | 0.59               |
| 39 | 41               | 800                           | 230        | 45.29              | 11.76 | 2.70            | 0.00           | 11.32               | 2.57            | 0.88               |
| 40 | 41               | 800                           | 240        | 45.29              | 11.76 | 2.70            | 0.00           | 11                  | 2.60            | 1.27               |
| 41 | 41               | 800                           | 250        | 45.29              | 11.76 | 2.70            | 0.00           | 10.63               | 2.62            | 1.74               |
| 42 | 41               | 800                           | 260        | 45.29              | 11.76 | 2.70            | 0.00           | 10.34               | 2.65            | 2.09               |
| 43 | 41               | 1000                          | 210        | 45.26              | 11.79 | 2.71            | 0.00           | 11.72               | 2.56            | 0.32               |
| 44 | 41               | 1000                          | 220        | 45.26              | 11.79 | 2.71            | 0.00           | 11.56               | 2.55            | 0.47               |
| 45 | 41               | 1000                          | 230        | 45.26              | 11.79 | 2.71            | 0.00           | 11.43               | 2.56            | 0.70               |
| 46 | 41               | 1000                          | 240        | 45.26              | 11.79 | 2.71            | 0.00           | 11.18               | 2.58            | 1.02               |
| 47 | 41               | 1000                          | 250        | 45.26              | 11.79 | 2.71            | 0.00           | 10.9                | 2.62            | 1.43               |
| 48 | 41               | 1000                          | 260        | 45.26              | 11.79 | 2.71            | 0.00           | 10.61               | 2.64            | 1.79               |
| 49 | 41               | 600                           | 210        | 45.33              | 11.72 | 5.68            | 0.00           | 11.65               | 5.44            | 0.64               |
| 50 | 41               | 600                           | 220        | 45.33              | 11.72 | 5.68            | 0.00           | 11.55               | 5.51            | 0.86               |

|     |    |      |     |       |       |      |      |       |      |      |
|-----|----|------|-----|-------|-------|------|------|-------|------|------|
| 51  | 41 | 600  | 230 | 45.33 | 11.72 | 5.68 | 0.00 | 11.23 | 5.57 | 1.22 |
| 52  | 41 | 600  | 240 | 45.33 | 11.72 | 5.68 | 0.00 | 10.88 | 5.64 | 1.73 |
| 53  | 41 | 600  | 250 | 45.33 | 11.72 | 5.68 | 0.00 | 10.49 | 5.73 | 2.23 |
| 54  | 41 | 600  | 260 | 45.33 | 11.72 | 5.68 | 0.00 | 10.33 | 5.79 | 2.48 |
| 55  | 41 | 800  | 210 | 45.34 | 11.72 | 5.66 | 0.00 | 11.74 | 5.45 | 0.50 |
| 56  | 41 | 800  | 220 | 45.34 | 11.72 | 5.66 | 0.00 | 11.69 | 5.48 | 0.66 |
| 57  | 41 | 800  | 230 | 45.34 | 11.72 | 5.66 | 0.00 | 11.53 | 5.53 | 0.92 |
| 58  | 41 | 800  | 240 | 45.34 | 11.72 | 5.66 | 0.00 | 11.21 | 5.56 | 1.30 |
| 59  | 41 | 800  | 250 | 45.34 | 11.72 | 5.66 | 0.00 | 10.87 | 5.64 | 1.75 |
| 60  | 41 | 800  | 260 | 45.34 | 11.72 | 5.66 | 0.00 | 10.68 | 5.72 | 2.06 |
| 61  | 41 | 600  | 210 | 45.37 | 10.10 | 4.20 | 0.00 | 9.93  | 3.99 | 0.61 |
| 62  | 41 | 600  | 220 | 45.37 | 10.10 | 4.20 | 0.00 | 9.93  | 4.06 | 0.82 |
| 63  | 41 | 600  | 230 | 45.37 | 10.10 | 4.20 | 0.00 | 9.63  | 4.09 | 1.18 |
| 64  | 41 | 600  | 240 | 45.37 | 10.10 | 4.20 | 0.00 | 9.22  | 4.14 | 1.66 |
| 65  | 41 | 600  | 250 | 45.37 | 10.10 | 4.20 | 0.00 | 8.90  | 4.20 | 2.09 |
| 66  | 41 | 600  | 260 | 45.37 | 10.10 | 4.20 | 0.00 | 8.74  | 4.23 | 2.25 |
| 67  | 41 | 800  | 210 | 45.36 | 10.12 | 4.20 | 0.00 | 10.09 | 4.00 | 0.48 |
| 68  | 41 | 800  | 220 | 45.36 | 10.12 | 4.20 | 0.00 | 10.08 | 4.03 | 0.63 |
| 69  | 41 | 800  | 230 | 45.36 | 10.12 | 4.20 | 0.00 | 9.87  | 4.05 | 0.89 |
| 70  | 41 | 800  | 240 | 45.36 | 10.12 | 4.20 | 0.00 | 9.62  | 4.11 | 1.26 |
| 71  | 41 | 800  | 250 | 45.36 | 10.12 | 4.20 | 0.00 | 9.24  | 4.14 | 1.66 |
| 72  | 41 | 800  | 260 | 45.36 | 10.12 | 4.20 | 0.00 | 9.06  | 4.18 | 1.90 |
| 73  | 41 | 600  | 210 | 45.36 | 8.54  | 2.76 | 0.00 | 8.41  | 2.55 | 0.59 |
| 74  | 41 | 600  | 220 | 45.36 | 8.54  | 2.76 | 0.00 | 8.38  | 2.59 | 0.78 |
| 75  | 41 | 600  | 230 | 45.36 | 8.54  | 2.76 | 0.00 | 8.09  | 2.62 | 1.13 |
| 76  | 41 | 600  | 240 | 45.36 | 8.54  | 2.76 | 0.00 | 7.75  | 2.66 | 1.56 |
| 77  | 41 | 600  | 250 | 45.36 | 8.54  | 2.76 | 0.00 | 7.42  | 2.69 | 1.89 |
| 78  | 41 | 600  | 260 | 45.36 | 8.54  | 2.76 | 0.00 | 7.31  | 2.70 | 1.98 |
| 79  | 41 | 800  | 210 | 45.33 | 8.63  | 2.73 | 0.00 | 8.52  | 2.55 | 0.45 |
| 80  | 41 | 800  | 220 | 45.33 | 8.63  | 2.73 | 0.00 | 8.46  | 2.59 | 0.59 |
| 81  | 41 | 800  | 230 | 45.33 | 8.63  | 2.73 | 0.00 | 8.37  | 2.60 | 0.86 |
| 82  | 41 | 800  | 240 | 45.33 | 8.63  | 2.73 | 0.00 | 8.05  | 2.63 | 1.19 |
| 83  | 41 | 800  | 250 | 45.33 | 8.63  | 2.73 | 0.00 | 7.79  | 2.66 | 1.53 |
| 84  | 41 | 800  | 260 | 45.33 | 8.63  | 2.73 | 0.00 | 7.60  | 2.68 | 1.71 |
| 85  | 41 | 600  | 210 | 45.35 | 8.76  | 5.58 | 0.00 | 8.63  | 5.28 | 0.60 |
| 86  | 41 | 600  | 220 | 45.35 | 8.76  | 5.58 | 0.00 | 8.53  | 5.28 | 0.86 |
| 87  | 41 | 600  | 230 | 45.35 | 8.76  | 5.58 | 0.00 | 8.36  | 5.31 | 1.19 |
| 88  | 41 | 600  | 240 | 45.35 | 8.76  | 5.58 | 0.00 | 7.98  | 5.35 | 1.63 |
| 89  | 41 | 600  | 250 | 45.35 | 8.76  | 5.58 | 0.00 | 7.61  | 5.39 | 2.05 |
| 90  | 41 | 600  | 260 | 45.35 | 8.76  | 5.58 | 0.00 | 7.50  | 5.40 | 2.20 |
| 91  | 41 | 800  | 210 | 45.30 | 8.84  | 5.59 | 0.00 | 8.72  | 5.29 | 0.47 |
| 92  | 41 | 800  | 220 | 45.30 | 8.84  | 5.59 | 0.00 | 8.69  | 5.29 | 0.66 |
| 93  | 41 | 800  | 230 | 45.30 | 8.84  | 5.59 | 0.00 | 8.54  | 5.27 | 0.91 |
| 94  | 41 | 800  | 240 | 45.30 | 8.84  | 5.59 | 0.00 | 8.37  | 5.31 | 1.25 |
| 95  | 41 | 800  | 250 | 45.30 | 8.84  | 5.59 | 0.00 | 8.08  | 5.31 | 1.61 |
| 96  | 41 | 800  | 260 | 45.30 | 8.84  | 5.59 | 0.00 | 7.82  | 5.35 | 1.87 |
| 97  | 41 | 1000 | 210 | 45.27 | 8.88  | 5.61 | 0.00 | 8.81  | 5.33 | 0.39 |
| 98  | 41 | 1000 | 220 | 45.27 | 8.88  | 5.61 | 0.00 | 8.72  | 5.28 | 0.54 |
| 99  | 41 | 1000 | 230 | 45.27 | 8.88  | 5.61 | 0.00 | 8.70  | 5.28 | 0.75 |
| 100 | 41 | 1000 | 240 | 45.27 | 8.88  | 5.61 | 0.00 | 8.50  | 5.30 | 1.03 |
| 101 | 41 | 1000 | 250 | 45.27 | 8.88  | 5.61 | 0.00 | 8.33  | 5.30 | 1.34 |
| 102 | 41 | 1000 | 260 | 45.27 | 8.88  | 5.61 | 0.00 | 8.04  | 5.33 | 1.62 |
| 103 | 41 | 600  | 210 | 45.19 | 8.82  | 8.84 | 0.00 | 8.84  | 8.37 | 0.67 |
| 104 | 41 | 600  | 220 | 45.19 | 8.82  | 8.84 | 0.00 | 8.72  | 8.38 | 0.87 |
| 105 | 41 | 600  | 230 | 45.19 | 8.82  | 8.84 | 0.00 | 8.52  | 8.41 | 1.16 |
| 106 | 41 | 600  | 240 | 45.19 | 8.82  | 8.84 | 0.00 | 8.26  | 8.47 | 1.51 |
| 107 | 41 | 600  | 250 | 45.19 | 8.82  | 8.84 | 0.00 | 8.06  | 8.54 | 1.83 |
| 108 | 41 | 600  | 260 | 45.19 | 8.82  | 8.84 | 0.00 | 8.00  | 8.59 | 2.01 |

|     |    |      |     |       |      |       |      |      |      |      |
|-----|----|------|-----|-------|------|-------|------|------|------|------|
| 109 | 41 | 800  | 210 | 45.15 | 8.89 | 8.83  | 0.00 | 8.86 | 8.39 | 0.54 |
| 110 | 41 | 800  | 220 | 45.15 | 8.89 | 8.83  | 0.00 | 8.89 | 8.41 | 0.69 |
| 111 | 41 | 800  | 230 | 45.15 | 8.89 | 8.83  | 0.00 | 8.74 | 8.37 | 0.91 |
| 112 | 41 | 800  | 240 | 45.15 | 8.89 | 8.83  | 0.00 | 8.54 | 8.39 | 1.21 |
| 113 | 41 | 800  | 250 | 45.15 | 8.89 | 8.83  | 0.00 | 8.36 | 8.41 | 1.52 |
| 114 | 41 | 800  | 260 | 45.15 | 8.89 | 8.83  | 0.00 | 8.28 | 8.47 | 1.73 |
| 115 | 41 | 600  | 210 | 45.19 | 7.32 | 7.33  | 0.00 | 7.28 | 6.82 | 0.66 |
| 116 | 41 | 600  | 220 | 45.19 | 7.32 | 7.33  | 0.00 | 7.21 | 6.86 | 0.85 |
| 117 | 41 | 600  | 230 | 45.19 | 7.32 | 7.33  | 0.00 | 6.99 | 6.86 | 1.12 |
| 118 | 41 | 600  | 240 | 45.19 | 7.32 | 7.33  | 0.00 | 6.74 | 6.90 | 1.44 |
| 119 | 41 | 600  | 250 | 45.19 | 7.32 | 7.33  | 0.00 | 6.48 | 6.92 | 1.72 |
| 120 | 41 | 600  | 260 | 45.19 | 7.32 | 7.33  | 0.00 | 6.49 | 6.97 | 1.76 |
| 121 | 41 | 800  | 210 | 45.17 | 7.35 | 7.32  | 0.00 | 7.39 | 6.86 | 0.53 |
| 122 | 41 | 800  | 220 | 45.17 | 7.35 | 7.32  | 0.00 | 7.36 | 6.87 | 0.67 |
| 123 | 41 | 800  | 230 | 45.17 | 7.35 | 7.32  | 0.00 | 7.19 | 6.82 | 0.89 |
| 124 | 41 | 800  | 240 | 45.17 | 7.35 | 7.32  | 0.00 | 7.03 | 6.84 | 1.16 |
| 125 | 41 | 800  | 250 | 45.17 | 7.35 | 7.32  | 0.00 | 6.79 | 6.87 | 1.43 |
| 126 | 41 | 800  | 260 | 45.17 | 7.35 | 7.32  | 0.00 | 6.69 | 6.88 | 1.58 |
| 127 | 41 | 600  | 210 | 45.19 | 5.82 | 5.81  | 0.00 | 5.74 | 5.30 | 0.64 |
| 128 | 41 | 600  | 220 | 45.19 | 5.82 | 5.81  | 0.00 | 5.65 | 5.30 | 0.82 |
| 129 | 41 | 600  | 230 | 45.19 | 5.82 | 5.81  | 0.00 | 5.45 | 5.30 | 1.08 |
| 130 | 41 | 600  | 240 | 45.19 | 5.82 | 5.81  | 0.00 | 5.20 | 5.32 | 1.36 |
| 131 | 41 | 600  | 250 | 45.19 | 5.82 | 5.81  | 0.00 | 5.03 | 5.36 | 1.56 |
| 132 | 41 | 600  | 260 | 45.19 | 5.82 | 5.81  | 0.00 | 5.05 | 5.35 | 1.55 |
| 133 | 41 | 800  | 210 | 45.18 | 5.84 | 5.80  | 0.00 | 5.79 | 5.3  | 0.51 |
| 134 | 41 | 800  | 220 | 45.18 | 5.84 | 5.80  | 0.00 | 5.78 | 5.32 | 0.65 |
| 135 | 41 | 800  | 230 | 45.18 | 5.84 | 5.80  | 0.00 | 5.64 | 5.28 | 0.86 |
| 136 | 41 | 800  | 240 | 45.18 | 5.84 | 5.80  | 0.00 | 5.45 | 5.27 | 1.10 |
| 137 | 41 | 800  | 250 | 45.18 | 5.84 | 5.80  | 0.00 | 5.31 | 5.31 | 1.32 |
| 138 | 41 | 800  | 260 | 45.18 | 5.84 | 5.80  | 0.00 | 5.24 | 5.30 | 1.39 |
| 139 | 41 | 600  | 210 | 45.31 | 5.87 | 8.54  | 0.00 | 5.85 | 8.08 | 0.67 |
| 140 | 41 | 600  | 220 | 45.31 | 5.87 | 8.54  | 0.00 | 5.79 | 8.04 | 0.88 |
| 141 | 41 | 600  | 230 | 45.31 | 5.87 | 8.54  | 0.00 | 5.65 | 7.98 | 1.15 |
| 142 | 41 | 600  | 240 | 45.31 | 5.87 | 8.54  | 0.00 | 5.43 | 7.98 | 1.45 |
| 143 | 41 | 600  | 250 | 45.31 | 5.87 | 8.54  | 0.00 | 5.28 | 7.98 | 1.67 |
| 144 | 41 | 600  | 260 | 45.31 | 5.87 | 8.54  | 0.00 | 5.29 | 7.97 | 1.70 |
| 145 | 41 | 800  | 210 | 45.31 | 5.89 | 8.52  | 0.00 | 5.92 | 8.14 | 0.54 |
| 146 | 41 | 800  | 220 | 45.31 | 5.89 | 8.52  | 0.00 | 5.90 | 8.06 | 0.71 |
| 147 | 41 | 800  | 230 | 45.31 | 5.89 | 8.52  | 0.00 | 5.83 | 7.98 | 0.92 |
| 148 | 41 | 800  | 240 | 45.31 | 5.89 | 8.52  | 0.00 | 5.70 | 7.94 | 1.16 |
| 149 | 41 | 800  | 250 | 45.31 | 5.89 | 8.52  | 0.00 | 5.56 | 7.94 | 1.39 |
| 150 | 41 | 800  | 260 | 45.31 | 5.89 | 8.52  | 0.00 | 5.48 | 7.90 | 1.51 |
| 151 | 41 | 1000 | 210 | 45.29 | 5.92 | 8.53  | 0.00 | 5.91 | 8.17 | 0.46 |
| 152 | 41 | 1000 | 220 | 45.29 | 5.92 | 8.53  | 0.00 | 5.96 | 8.08 | 0.6  |
| 153 | 41 | 1000 | 230 | 45.29 | 5.92 | 8.53  | 0.00 | 5.94 | 8.01 | 0.79 |
| 154 | 41 | 1000 | 240 | 45.29 | 5.92 | 8.53  | 0.00 | 5.87 | 7.94 | 0.99 |
| 155 | 41 | 1000 | 250 | 45.29 | 5.92 | 8.53  | 0.00 | 5.75 | 7.90 | 1.19 |
| 156 | 41 | 1000 | 260 | 45.29 | 5.92 | 8.53  | 0.00 | 5.62 | 7.84 | 1.33 |
| 157 | 41 | 600  | 210 | 45.14 | 4.34 | 10.39 | 0.00 | 4.44 | 9.74 | 0.70 |
| 158 | 41 | 600  | 220 | 45.14 | 4.34 | 10.39 | 0.00 | 4.45 | 9.68 | 0.87 |
| 159 | 41 | 600  | 230 | 45.14 | 4.34 | 10.39 | 0.00 | 4.39 | 9.58 | 1.03 |
| 160 | 41 | 600  | 240 | 45.14 | 4.34 | 10.39 | 0.00 | 4.34 | 9.57 | 1.19 |
| 161 | 41 | 600  | 250 | 45.14 | 4.34 | 10.39 | 0.00 | 4.29 | 9.45 | 1.32 |
| 162 | 41 | 600  | 260 | 45.14 | 4.34 | 10.39 | 0.00 | 4.40 | 9.39 | 1.33 |
| 163 | 41 | 800  | 210 | 45.12 | 4.37 | 10.41 | 0.00 | 4.47 | 9.79 | 0.58 |
| 164 | 41 | 800  | 220 | 45.12 | 4.37 | 10.41 | 0.00 | 4.50 | 9.70 | 0.72 |
| 165 | 41 | 800  | 230 | 45.12 | 4.37 | 10.41 | 0.00 | 4.51 | 9.61 | 0.89 |
| 166 | 41 | 800  | 240 | 45.12 | 4.37 | 10.41 | 0.00 | 4.50 | 9.52 | 1.04 |

|     |    |      |     |       |       |       |      |       |       |      |
|-----|----|------|-----|-------|-------|-------|------|-------|-------|------|
| 167 | 41 | 800  | 250 | 45.12 | 4.37  | 10.41 | 0.00 | 4.45  | 9.40  | 1.16 |
| 168 | 41 | 800  | 260 | 45.12 | 4.37  | 10.41 | 0.00 | 4.54  | 9.34  | 1.20 |
| 169 | 41 | 600  | 210 | 45.34 | 2.86  | 11.49 | 0.00 | 3.04  | 11.18 | 0.66 |
| 170 | 41 | 600  | 220 | 45.34 | 2.86  | 11.49 | 0.00 | 3.13  | 11.24 | 0.82 |
| 171 | 41 | 600  | 230 | 45.34 | 2.86  | 11.49 | 0.00 | 3.22  | 11.09 | 0.96 |
| 172 | 41 | 600  | 240 | 45.34 | 2.86  | 11.49 | 0.00 | 3.16  | 10.94 | 1.07 |
| 173 | 41 | 600  | 250 | 45.34 | 2.86  | 11.49 | 0.00 | 3.38  | 10.86 | 1.17 |
| 174 | 41 | 600  | 260 | 45.34 | 2.86  | 11.49 | 0.00 | 3.52  | 10.74 | 1.13 |
| 175 | 41 | 800  | 210 | 45.35 | 2.87  | 11.46 | 0.00 | 3.05  | 11.30 | 0.55 |
| 176 | 41 | 800  | 220 | 45.35 | 2.87  | 11.46 | 0.00 | 3.13  | 11.31 | 0.68 |
| 177 | 41 | 800  | 230 | 45.35 | 2.87  | 11.46 | 0.00 | 3.24  | 11.16 | 0.84 |
| 178 | 41 | 800  | 240 | 45.35 | 2.87  | 11.46 | 0.00 | 3.25  | 10.94 | 0.95 |
| 179 | 41 | 800  | 250 | 45.35 | 2.87  | 11.46 | 0.00 | 3.47  | 10.84 | 1.07 |
| 180 | 41 | 800  | 260 | 45.35 | 2.87  | 11.46 | 0.00 | 3.60  | 10.70 | 1.06 |
| 181 | 41 | 1000 | 210 | 45.33 | 2.89  | 11.48 | 0.00 | 3.05  | 11.35 | 0.47 |
| 182 | 41 | 1000 | 220 | 45.33 | 2.89  | 11.48 | 0.00 | 3.13  | 11.42 | 0.59 |
| 183 | 41 | 1000 | 230 | 45.33 | 2.89  | 11.48 | 0.00 | 3.22  | 11.19 | 0.74 |
| 184 | 41 | 1000 | 240 | 45.33 | 2.89  | 11.48 | 0.00 | 3.32  | 11.01 | 0.87 |
| 185 | 41 | 1000 | 250 | 45.33 | 2.89  | 11.48 | 0.00 | 3.50  | 10.81 | 0.98 |
| 186 | 41 | 1000 | 260 | 45.33 | 2.89  | 11.48 | 0.00 | 3.64  | 10.67 | 1.00 |
| 187 | 41 | 600  | 220 | 55.22 | 11.94 | 2.72  | 0.00 | 11.62 | 2.53  | 0.88 |
| 188 | 41 | 600  | 235 | 55.22 | 11.94 | 2.72  | 0.00 | 11.00 | 2.59  | 1.73 |
| 189 | 41 | 600  | 250 | 55.22 | 11.94 | 2.72  | 0.00 | 10.18 | 2.66  | 2.89 |
| 190 | 41 | 800  | 220 | 55.15 | 12.03 | 2.74  | 0.00 | 11.72 | 2.53  | 0.66 |
| 191 | 41 | 800  | 235 | 55.15 | 12.03 | 2.74  | 0.00 | 11.34 | 2.56  | 1.28 |
| 192 | 41 | 800  | 250 | 55.15 | 12.03 | 2.74  | 0.00 | 10.59 | 2.62  | 2.22 |
| 193 | 41 | 600  | 220 | 55.23 | 8.99  | 5.66  | 0.00 | 8.74  | 5.26  | 0.96 |
| 194 | 41 | 600  | 235 | 55.23 | 8.99  | 5.66  | 0.00 | 8.25  | 5.29  | 1.73 |
| 195 | 41 | 600  | 250 | 55.23 | 8.99  | 5.66  | 0.00 | 7.56  | 5.41  | 2.62 |
| 196 | 41 | 800  | 220 | 55.20 | 9.02  | 5.67  | 0.00 | 8.91  | 5.27  | 0.76 |
| 197 | 41 | 800  | 235 | 55.20 | 9.02  | 5.67  | 0.00 | 8.54  | 5.25  | 1.31 |
| 198 | 41 | 800  | 250 | 55.20 | 9.02  | 5.67  | 0.00 | 8.06  | 5.33  | 2.04 |
| 199 | 41 | 600  | 220 | 55.17 | 6.01  | 8.72  | 0.00 | 5.98  | 8.06  | 1.04 |
| 200 | 41 | 600  | 235 | 55.17 | 6.01  | 8.72  | 0.00 | 5.68  | 8.00  | 1.60 |
| 201 | 41 | 600  | 250 | 55.17 | 6.01  | 8.72  | 0.00 | 5.31  | 8.01  | 2.15 |
| 202 | 41 | 800  | 220 | 55.16 | 6.03  | 8.72  | 0.00 | 6.08  | 8.09  | 0.85 |
| 203 | 41 | 800  | 235 | 55.16 | 6.03  | 8.72  | 0.00 | 5.93  | 7.95  | 1.29 |
| 204 | 41 | 800  | 250 | 55.16 | 6.03  | 8.72  | 0.00 | 5.65  | 7.93  | 1.75 |
| 205 | 41 | 600  | 220 | 60.31 | 15.84 | 3.75  | 0.00 | 15.68 | 3.79  | 0.96 |
| 206 | 41 | 600  | 250 | 60.31 | 15.84 | 3.75  | 0.00 | 14.44 | 4.02  | 3.18 |
| 207 | 41 | 800  | 220 | 60.19 | 16.01 | 3.74  | 0.00 | 15.85 | 3.76  | 0.74 |
| 208 | 41 | 800  | 250 | 60.19 | 16.01 | 3.74  | 0.00 | 14.93 | 3.91  | 2.37 |
| 209 | 41 | 600  | 220 | 60.10 | 12.12 | 7.75  | 0.00 | 11.84 | 7.85  | 1.07 |
| 210 | 41 | 600  | 250 | 60.10 | 12.12 | 7.75  | 0.00 | 10.61 | 8.05  | 2.80 |
| 211 | 41 | 800  | 220 | 60.07 | 12.16 | 7.75  | 0.00 | 11.98 | 7.88  | 0.83 |
| 212 | 41 | 800  | 250 | 60.07 | 12.16 | 7.75  | 0.00 | 11.25 | 7.90  | 2.17 |
| 213 | 41 | 600  | 220 | 60.27 | 8.01  | 11.63 | 0.00 | 8.07  | 11.95 | 1.13 |
| 214 | 41 | 600  | 250 | 60.27 | 8.01  | 11.63 | 0.00 | 7.45  | 11.94 | 2.33 |
| 215 | 41 | 800  | 220 | 60.31 | 8.00  | 11.59 | 0.00 | 8.23  | 11.98 | 0.92 |
| 216 | 41 | 800  | 250 | 60.31 | 8.00  | 11.59 | 0.00 | 7.91  | 11.82 | 1.92 |
| 217 | 61 | 600  | 220 | 35.37 | 11.47 | 2.64  | 0.00 | 11.02 | 2.56  | 0.96 |
| 218 | 61 | 800  | 220 | 35.33 | 11.52 | 2.67  | 0.00 | 11.25 | 2.57  | 0.72 |
| 219 | 61 | 600  | 220 | 45.38 | 11.66 | 2.63  | 0.00 | 11.01 | 2.52  | 1.07 |
| 220 | 61 | 800  | 220 | 45.31 | 11.75 | 2.67  | 0.00 | 11.30 | 2.51  | 0.81 |
| 221 | 61 | 1000 | 220 | 45.31 | 11.73 | 2.69  | 0.00 | 11.49 | 2.51  | 0.64 |
| 222 | 61 | 600  | 220 | 55.28 | 11.84 | 2.72  | 0.00 | 11.27 | 2.50  | 1.39 |
| 223 | 61 | 800  | 220 | 55.21 | 11.94 | 2.74  | 0.00 | 11.57 | 2.48  | 1.02 |
| 224 | 61 | 600  | 235 | 45.38 | 11.66 | 2.63  | 0.00 | 10.41 | 2.59  | 2.07 |

|     |    |      |     |       |       |       |      |       |       |      |
|-----|----|------|-----|-------|-------|-------|------|-------|-------|------|
| 225 | 61 | 800  | 235 | 45.31 | 11.75 | 2.67  | 0.00 | 10.85 | 2.56  | 1.51 |
| 226 | 61 | 1000 | 235 | 45.31 | 11.73 | 2.69  | 0.00 | 11.17 | 2.55  | 1.18 |
| 227 | 61 | 600  | 250 | 45.38 | 11.66 | 2.63  | 0.00 | 9.33  | 2.69  | 3.64 |
| 228 | 61 | 800  | 250 | 45.31 | 11.75 | 2.67  | 0.00 | 9.93  | 2.64  | 2.81 |
| 229 | 61 | 1000 | 250 | 45.31 | 11.73 | 2.69  | 0.00 | 10.36 | 2.61  | 2.26 |
| 230 | 61 | 600  | 250 | 55.28 | 11.84 | 2.72  | 0.00 | 8.35  | 2.78  | 5.33 |
| 231 | 61 | 800  | 250 | 55.21 | 11.94 | 2.74  | 0.00 | 9.20  | 2.71  | 4.57 |
| 232 | 61 | 600  | 220 | 45.37 | 8.75  | 5.56  | 0.00 | 8.35  | 5.20  | 1.12 |
| 233 | 61 | 800  | 220 | 45.35 | 8.78  | 5.56  | 0.00 | 8.56  | 5.20  | 0.87 |
| 234 | 61 | 1000 | 220 | 45.36 | 8.77  | 5.55  | 0.00 | 8.70  | 5.22  | 0.72 |
| 235 | 61 | 600  | 235 | 45.37 | 8.75  | 5.56  | 0.00 | 7.73  | 5.29  | 1.91 |
| 236 | 61 | 800  | 235 | 45.35 | 8.78  | 5.56  | 0.00 | 8.18  | 5.23  | 1.47 |
| 237 | 61 | 1000 | 235 | 45.36 | 8.77  | 5.55  | 0.00 | 8.39  | 5.22  | 1.18 |
| 238 | 61 | 600  | 250 | 45.37 | 8.75  | 5.56  | 0.00 | 6.76  | 5.42  | 3.21 |
| 239 | 61 | 800  | 250 | 45.35 | 8.78  | 5.56  | 0.00 | 7.41  | 5.34  | 2.51 |
| 240 | 61 | 1000 | 250 | 45.36 | 8.77  | 5.55  | 0.00 | 7.82  | 5.29  | 2.03 |
| 241 | 61 | 600  | 220 | 35.37 | 5.75  | 8.36  | 0.00 | 5.54  | 7.94  | 0.99 |
| 242 | 61 | 800  | 220 | 35.36 | 5.75  | 8.37  | 0.00 | 5.72  | 7.95  | 0.79 |
| 243 | 61 | 600  | 220 | 45.33 | 5.86  | 8.52  | 0.00 | 5.68  | 7.94  | 1.10 |
| 244 | 61 | 800  | 220 | 45.35 | 5.85  | 8.48  | 0.00 | 5.84  | 7.94  | 0.93 |
| 245 | 61 | 1000 | 220 | 45.33 | 5.89  | 8.49  | 0.00 | 5.91  | 7.97  | 0.78 |
| 246 | 61 | 600  | 220 | 55.19 | 5.97  | 8.74  | 0.00 | 5.80  | 7.94  | 1.41 |
| 247 | 61 | 800  | 220 | 55.17 | 6.01  | 8.73  | 0.00 | 5.99  | 7.95  | 1.17 |
| 248 | 61 | 600  | 235 | 45.33 | 5.86  | 8.52  | 0.00 | 5.30  | 7.96  | 1.72 |
| 249 | 61 | 800  | 235 | 45.35 | 5.85  | 8.48  | 0.00 | 5.59  | 7.89  | 1.38 |
| 250 | 61 | 1000 | 235 | 45.33 | 5.89  | 8.49  | 0.00 | 5.75  | 7.84  | 1.17 |
| 251 | 61 | 600  | 250 | 35.37 | 5.75  | 8.36  | 0.00 | 4.62  | 8.08  | 2.17 |
| 252 | 61 | 800  | 250 | 35.36 | 5.75  | 8.37  | 0.00 | 5.04  | 8.00  | 1.78 |
| 253 | 61 | 600  | 250 | 45.33 | 5.86  | 8.52  | 0.00 | 4.67  | 7.97  | 2.60 |
| 254 | 61 | 800  | 250 | 45.35 | 5.85  | 8.48  | 0.00 | 5.14  | 7.90  | 2.05 |
| 255 | 61 | 1000 | 250 | 45.33 | 5.89  | 8.49  | 0.00 | 5.41  | 7.84  | 1.73 |
| 256 | 61 | 600  | 250 | 55.19 | 5.97  | 8.74  | 0.00 | 4.41  | 8.02  | 3.44 |
| 257 | 61 | 800  | 250 | 55.17 | 6.01  | 8.73  | 0.00 | 5.04  | 7.94  | 2.69 |
| 258 | 61 | 600  | 220 | 45.32 | 2.90  | 11.49 | 0.00 | 3.08  | 10.66 | 1.06 |
| 259 | 61 | 800  | 220 | 45.33 | 2.91  | 11.46 | 0.00 | 3.13  | 10.74 | 0.94 |
| 260 | 61 | 1000 | 220 | 45.31 | 2.94  | 11.48 | 0.00 | 3.13  | 10.78 | 0.83 |
| 261 | 61 | 600  | 235 | 45.32 | 2.90  | 11.49 | 0.00 | 3.07  | 10.40 | 1.42 |
| 262 | 61 | 800  | 235 | 45.33 | 2.91  | 11.46 | 0.00 | 3.18  | 10.42 | 1.24 |
| 263 | 61 | 1000 | 235 | 45.31 | 2.94  | 11.48 | 0.00 | 3.23  | 10.48 | 1.14 |
| 264 | 61 | 600  | 250 | 45.32 | 2.90  | 11.49 | 0.00 | 2.97  | 10.26 | 1.82 |
| 265 | 61 | 800  | 250 | 45.33 | 2.91  | 11.46 | 0.00 | 3.18  | 10.23 | 1.52 |
| 266 | 61 | 1000 | 250 | 45.31 | 2.94  | 11.48 | 0.00 | 3.31  | 10.23 | 1.41 |
| 267 | 41 | 600  | 220 | 20.67 | 28.30 | 4.53  | 0.00 | 28.00 | 4.53  | 0.53 |
| 268 | 41 | 600  | 230 | 20.67 | 28.30 | 4.53  | 0.00 | 27.92 | 4.54  | 0.82 |
| 269 | 41 | 600  | 240 | 20.67 | 28.30 | 4.53  | 0.00 | 27.95 | 4.59  | 1.16 |
| 270 | 41 | 600  | 250 | 20.67 | 28.30 | 4.53  | 0.00 | 27.88 | 4.64  | 1.40 |
| 271 | 41 | 600  | 260 | 20.67 | 28.30 | 4.53  | 0.00 | 27.77 | 4.66  | 1.42 |
| 272 | 41 | 800  | 220 | 20.62 | 28.51 | 4.49  | 0.00 | 28.10 | 4.52  | 0.39 |
| 273 | 41 | 800  | 230 | 20.62 | 28.51 | 4.49  | 0.00 | 28.21 | 4.53  | 0.61 |
| 274 | 41 | 800  | 240 | 20.62 | 28.51 | 4.49  | 0.00 | 28.03 | 4.55  | 0.89 |
| 275 | 41 | 800  | 250 | 20.62 | 28.51 | 4.49  | 0.00 | 28.11 | 4.62  | 1.15 |
| 276 | 41 | 800  | 260 | 20.62 | 28.51 | 4.49  | 0.00 | 27.88 | 4.63  | 1.23 |
| 277 | 41 | 600  | 220 | 30.78 | 28.56 | 2.70  | 0.00 | 28.40 | 2.68  | 0.71 |
| 278 | 41 | 600  | 230 | 30.78 | 28.56 | 2.70  | 0.00 | 28.38 | 2.70  | 1.12 |
| 279 | 41 | 600  | 240 | 30.78 | 28.56 | 2.70  | 0.00 | 28.21 | 2.74  | 1.67 |
| 280 | 41 | 600  | 250 | 30.78 | 28.56 | 2.70  | 0.00 | 27.98 | 2.79  | 2.16 |
| 281 | 41 | 600  | 260 | 30.78 | 28.56 | 2.70  | 0.00 | 27.83 | 2.84  | 2.39 |
| 282 | 41 | 800  | 220 | 30.74 | 28.64 | 2.71  | 0.00 | 28.39 | 2.67  | 0.52 |

|     |    |     |     |       |       |       |      |       |       |      |
|-----|----|-----|-----|-------|-------|-------|------|-------|-------|------|
| 283 | 41 | 800 | 230 | 30.74 | 28.64 | 2.71  | 0.00 | 28.35 | 2.68  | 0.83 |
| 284 | 41 | 800 | 240 | 30.74 | 28.64 | 2.71  | 0.00 | 28.47 | 2.72  | 1.26 |
| 285 | 41 | 800 | 250 | 30.74 | 28.64 | 2.71  | 0.00 | 28.19 | 2.76  | 1.72 |
| 286 | 41 | 800 | 260 | 30.74 | 28.64 | 2.71  | 0.00 | 27.92 | 2.80  | 2.01 |
| 287 | 41 | 600 | 230 | 30.78 | 28.72 | 4.58  | 0.00 | 28.51 | 4.62  | 1.12 |
| 288 | 41 | 600 | 240 | 30.78 | 28.72 | 4.58  | 0.00 | 28.53 | 4.70  | 1.70 |
| 289 | 41 | 600 | 250 | 30.78 | 28.72 | 4.58  | 0.00 | 28.22 | 4.77  | 2.26 |
| 290 | 41 | 600 | 260 | 30.78 | 28.72 | 4.58  | 0.00 | 28.16 | 4.83  | 2.54 |
| 291 | 41 | 800 | 230 | 31.07 | 28.16 | 4.53  | 0.00 | 28.72 | 4.59  | 0.84 |
| 292 | 41 | 800 | 240 | 31.07 | 28.16 | 4.53  | 0.00 | 28.59 | 4.64  | 1.27 |
| 293 | 41 | 800 | 250 | 31.07 | 28.16 | 4.53  | 0.00 | 28.59 | 4.73  | 1.77 |
| 294 | 41 | 800 | 260 | 31.07 | 28.16 | 4.53  | 0.00 | 28.27 | 4.76  | 2.12 |
| 295 | 41 | 600 | 220 | 30.72 | 29.02 | 7.49  | 0.00 | 28.93 | 7.46  | 0.77 |
| 296 | 41 | 600 | 230 | 30.72 | 29.02 | 7.49  | 0.00 | 28.96 | 7.58  | 1.20 |
| 297 | 41 | 600 | 240 | 30.72 | 29.02 | 7.49  | 0.00 | 28.78 | 7.68  | 1.84 |
| 298 | 41 | 600 | 250 | 30.72 | 29.02 | 7.49  | 0.00 | 28.59 | 7.82  | 2.48 |
| 299 | 41 | 600 | 260 | 30.72 | 29.02 | 7.49  | 0.00 | 28.19 | 7.86  | 2.76 |
| 300 | 41 | 800 | 220 | 30.72 | 29.03 | 7.49  | 0.00 | 28.90 | 7.42  | 0.57 |
| 301 | 41 | 800 | 230 | 30.72 | 29.03 | 7.49  | 0.00 | 28.89 | 7.47  | 0.89 |
| 302 | 41 | 800 | 240 | 30.72 | 29.03 | 7.49  | 0.00 | 28.95 | 7.58  | 1.37 |
| 303 | 41 | 800 | 250 | 30.72 | 29.03 | 7.49  | 0.00 | 28.83 | 7.69  | 1.92 |
| 304 | 41 | 800 | 260 | 30.72 | 29.03 | 7.49  | 0.00 | 28.42 | 7.75  | 2.30 |
| 305 | 41 | 600 | 220 | 30.31 | 30.32 | 19.17 | 0.00 | 30.36 | 19.33 | 0.79 |
| 306 | 41 | 600 | 230 | 30.31 | 30.32 | 19.17 | 0.00 | 30.13 | 19.39 | 1.18 |
| 307 | 41 | 600 | 240 | 30.31 | 30.32 | 19.17 | 0.00 | 29.95 | 19.61 | 1.74 |
| 308 | 41 | 600 | 250 | 30.31 | 30.32 | 19.17 | 0.00 | 29.89 | 19.97 | 2.37 |
| 309 | 41 | 600 | 260 | 30.31 | 30.32 | 19.17 | 0.00 | 29.57 | 20.11 | 2.75 |
| 310 | 41 | 800 | 220 | 30.17 | 30.42 | 19.29 | 0.00 | 30.37 | 19.15 | 0.61 |
| 311 | 41 | 800 | 230 | 30.17 | 30.42 | 19.29 | 0.00 | 30.32 | 19.26 | 0.89 |
| 312 | 41 | 800 | 240 | 30.17 | 30.42 | 19.29 | 0.00 | 30.34 | 19.46 | 1.30 |
| 313 | 41 | 800 | 250 | 30.17 | 30.42 | 19.29 | 0.00 | 30.18 | 19.72 | 1.81 |
| 314 | 41 | 800 | 260 | 30.17 | 30.42 | 19.29 | 0.00 | 29.78 | 19.86 | 2.22 |
| 315 | 41 | 600 | 220 | 40.66 | 29.25 | 4.68  | 0.00 | 28.96 | 4.62  | 0.91 |
| 316 | 41 | 600 | 230 | 40.66 | 29.25 | 4.68  | 0.00 | 29.09 | 4.69  | 1.47 |
| 317 | 41 | 600 | 240 | 40.66 | 29.25 | 4.68  | 0.00 | 28.85 | 4.78  | 2.31 |
| 318 | 41 | 600 | 250 | 40.66 | 29.25 | 4.68  | 0.00 | 28.71 | 4.92  | 3.27 |
| 319 | 41 | 600 | 260 | 40.66 | 29.25 | 4.68  | 0.00 | 28.46 | 5.01  | 3.91 |
| 320 | 41 | 800 | 220 | 40.65 | 29.27 | 4.68  | 0.00 | 29.16 | 4.60  | 0.68 |
| 321 | 41 | 800 | 230 | 40.65 | 29.27 | 4.68  | 0.00 | 28.89 | 4.61  | 1.06 |
| 322 | 41 | 800 | 240 | 40.65 | 29.27 | 4.68  | 0.00 | 29.06 | 4.71  | 1.69 |
| 323 | 41 | 800 | 250 | 40.65 | 29.27 | 4.68  | 0.00 | 28.90 | 4.81  | 2.47 |
| 324 | 41 | 800 | 260 | 40.65 | 29.27 | 4.68  | 0.00 | 28.59 | 4.91  | 3.16 |
| 325 | 41 | 600 | 210 | 35.42 | 13.98 | 0.00  | 0.00 | 13.84 | 0.00  | 0.07 |
| 326 | 41 | 600 | 250 | 35.42 | 13.98 | 0.00  | 0.00 | 13.64 | 0.01  | 0.30 |
| 327 | 41 | 800 | 210 | 35.42 | 13.97 | 0.00  | 0.00 | 13.91 | 0.00  | 0.05 |
| 328 | 41 | 800 | 250 | 35.42 | 13.97 | 0.00  | 0.00 | 13.75 | 0.01  | 0.21 |
| 329 | 41 | 600 | 210 | 45.40 | 14.24 | 0.00  | 0.00 | 14.14 | 0.00  | 0.09 |
| 330 | 41 | 600 | 220 | 45.40 | 14.24 | 0.00  | 0.00 | 14.03 | 0.00  | 0.12 |
| 331 | 41 | 600 | 230 | 45.40 | 14.24 | 0.00  | 0.00 | 14.02 | 0.00  | 0.17 |
| 332 | 41 | 600 | 240 | 45.40 | 14.24 | 0.00  | 0.00 | 14.01 | 0.00  | 0.25 |
| 333 | 41 | 600 | 250 | 45.40 | 14.24 | 0.00  | 0.00 | 13.87 | 0.01  | 0.40 |
| 334 | 41 | 600 | 260 | 45.40 | 14.24 | 0.00  | 0.00 | 13.77 | 0.02  | 0.51 |
| 335 | 41 | 800 | 210 | 45.28 | 14.47 | 0.00  | 0.00 | 14.16 | 0.00  | 0.06 |
| 336 | 41 | 800 | 220 | 45.28 | 14.47 | 0.00  | 0.00 | 14.15 | 0.00  | 0.09 |
| 337 | 41 | 800 | 230 | 45.28 | 14.47 | 0.00  | 0.00 | 14.12 | 0.00  | 0.12 |
| 338 | 41 | 800 | 240 | 45.28 | 14.47 | 0.00  | 0.00 | 14.10 | 0.00  | 0.17 |
| 339 | 41 | 800 | 250 | 45.28 | 14.47 | 0.00  | 0.00 | 14.06 | 0.01  | 0.28 |
| 340 | 41 | 800 | 260 | 45.28 | 14.47 | 0.00  | 0.00 | 13.96 | 0.01  | 0.34 |

|     |    |      |     |       |       |      |      |       |      |      |
|-----|----|------|-----|-------|-------|------|------|-------|------|------|
| 341 | 41 | 600  | 210 | 55.34 | 14.46 | 0.00 | 0.00 | 14.32 | 0.00 | 0.10 |
| 342 | 41 | 600  | 250 | 55.34 | 14.46 | 0.00 | 0.00 | 14.05 | 0.01 | 0.46 |
| 343 | 41 | 800  | 210 | 55.69 | 13.93 | 0.00 | 0.00 | 14.42 | 0.00 | 0.08 |
| 344 | 41 | 800  | 250 | 55.69 | 13.93 | 0.00 | 0.00 | 14.27 | 0.01 | 0.31 |
| 345 | 61 | 600  | 220 | 45.35 | 14.26 | 0.00 | 0.00 | 14.19 | 0.00 | 0.21 |
| 346 | 61 | 800  | 220 | 45.33 | 14.35 | 0.00 | 0.00 | 14.27 | 0.00 | 0.15 |
| 347 | 61 | 1000 | 220 | 45.29 | 14.44 | 0.00 | 0.00 | 14.39 | 0.00 | 0.12 |
| 348 | 61 | 600  | 220 | 55.19 | 14.69 | 0.00 | 0.00 | 14.52 | 0.00 | 0.32 |
| 349 | 61 | 800  | 220 | 55.16 | 14.76 | 0.00 | 0.00 | 14.58 | 0.00 | 0.21 |
| 350 | 61 | 600  | 235 | 45.35 | 14.26 | 0.00 | 0.00 | 14.01 | 0.00 | 0.37 |
| 351 | 61 | 800  | 235 | 45.33 | 14.35 | 0.00 | 0.00 | 14.16 | 0.00 | 0.25 |
| 352 | 61 | 1000 | 235 | 45.29 | 14.44 | 0.00 | 0.00 | 14.28 | 0.00 | 0.19 |
| 353 | 61 | 600  | 250 | 35.35 | 14.16 | 0.00 | 0.00 | 13.76 | 0.02 | 0.54 |
| 354 | 61 | 800  | 250 | 35.31 | 14.24 | 0.00 | 0.00 | 13.94 | 0.01 | 0.39 |
| 355 | 61 | 600  | 250 | 45.35 | 14.26 | 0.00 | 0.00 | 13.89 | 0.02 | 0.64 |
| 356 | 61 | 800  | 250 | 45.33 | 14.35 | 0.00 | 0.00 | 14.14 | 0.01 | 0.44 |
| 357 | 61 | 1000 | 250 | 45.29 | 14.44 | 0.00 | 0.00 | 14.19 | 0.00 | 0.33 |
| 358 | 61 | 600  | 250 | 55.19 | 14.69 | 0.00 | 0.00 | 14.13 | 0.01 | 0.75 |
| 359 | 61 | 800  | 250 | 55.16 | 14.76 | 0.00 | 0.00 | 14.35 | 0.01 | 0.54 |

**Table S2.** Estimated parameters of the free Gibbs energy change (Eq. 19 of the article) of the global reactions involved in the methanol synthesis.

|                                                                       | CO Hyd.    | CO <sub>2</sub> Hyd.    | WGSR                    |
|-----------------------------------------------------------------------|------------|-------------------------|-------------------------|
| m                                                                     | 1 (site a) | 2 (site a) - 3 (site b) | 4 (site a) - 5 (site b) |
| $A_1$ [kJ·mol <sup>-1</sup> ]                                         | - 83.913   | - 39.541                | - 44.378                |
| $A_2 \cdot 10^3$ [kJ·mol <sup>-1</sup> ·K <sup>-1</sup> ]             | 34.924     | - 69.587                | 104.505                 |
| $A_3 \cdot 10^3$ [kJ·mol <sup>-1</sup> ·K <sup>-1</sup> ]             | 28.138     | 37.259                  | - 9.118                 |
| $\Delta H_{Tr}^0$ [kJ·mol <sup>-1</sup> ]                             | - 75.524   | - 28.432                | - 47.096                |
| $\Delta S_{Tr}^0 \cdot 10^3$ [kJ·mol <sup>-1</sup> ·K <sup>-1</sup> ] | - 223.384  | - 179.957               | - 43.438                |
| $\Delta c_p \cdot 10^3$ [kJ·mol <sup>-1</sup> ·K <sup>-1</sup> ]      | - 28.138   | - 37.259                | 9.118                   |
